# Supplementary material for: Genomic and epidemiological analysis of SARS-CoV-2 viruses in Sri Lanka
Source: bioRxiv or medRxiv preprint supplement (doi:10.1101/2021.05.05.21256384), 2021-06-02
Supplement: Supplementary file [file media-2.pdf]

**Supplementary Table 2. Amino acid mutation counts of 231 sequences belonging to B.1.411 lineage.**

| Protein | AA_Substitution | Count | Mutation_ID  |
|---------|-----------------|-------|--------------|
| Spike   | D614G           | 228   | Spike_D614G  |
| NSP12   | M666I           | 224   | NSP12_M666I  |
| Spike   | H1159Y          | 215   | Spike_H1159Y |
| NSP6    | L37F            | 205   | NSP6_L37F    |
| NSP2    | T166I           | 202   | NSP2_T166I   |
| NSP12   | P323L           | 201   | NSP12_P323L  |
| N       | T205I           | 198   | N_T205I      |
| NS8     | Q18stop         | 164   | NS8_Q18stop  |
| NSP12   | D445G           | 154   | NSP12_D445G  |
| NS3     | Q57H            | 147   | NS3_Q57H     |
| NSP2    | T85I            | 109   | NSP2_T85I    |
| NSP3    | P654S           | 19    | NSP3_P654S   |
| Spike   | A684V           | 18    | Spike_A684V  |
| NS3     | T151S           | 16    | NS3_T151S    |
| Spike   | T676A           | 13    | Spike_T676A  |
| NSP6    | C221F           | 10    | NSP6_C221F   |
| NSP5    | K90R            | 9     | NSP5_K90R    |
| Spike   | M1229I          | 9     | Spike_M1229I |
| NS3     | R30H            | 8     | NS3_R30H     |
| NS3     | L108F           | 8     | NS3_L108F    |
| NS8     | R52I            | 8     | NS8_R52I     |
| Spike   | S98P            | 8     | Spike_S98P   |
| N       | T265I           | 7     | N_T265I      |
| NSP16   | R86K            | 7     | NSP16_R86K   |
| Spike   | S640F           | 7     | Spike_S640F  |
| NS8     | F120V           | 6     | NS8_F120V    |
| N       | K373R           | 6     | N_K373R      |
| NS8     | I121L           | 6     | NS8_I121L    |
| NSP6    | E195D           | 6     | NSP6_E195D   |
| NSP12   | V720I           | 6     | NSP12_V720I  |
| NSP9    | M101I           | 6     | NSP9_M101I   |
| Spike   | T716I           | 5     | Spike_T716I  |
| Spike   | T33S            | 5     | Spike_T33S   |
| NSP15   | T48I            | 5     | NSP15_T48I   |
| NSP14   | S450I           | 5     | NSP14_S450I  |
| NSP7    | T81I            | 5     | NSP7_T81I    |
| NSP12   | T85I            | 5     | NSP12_T85I   |
| Spike   | V70del          | 5     | Spike_V70del |
| Spike   | H69del          | 5     | Spike_H69del |
| NSP13   | H290Y           | 5     | NSP13_H290Y  |
| NSP3    | S1670F          | 4     | NSP3_S1670F  |
| Spike   | N679K           | 4     | Spike_N679K  |
| NSP13   | L581F           | 4     | NSP13_L581F  |
| NS8     | W45C            | 4     | NS8_W45C     |
| NSP14   | P203L           | 4     | NSP14_P203L  |
| NS8     | P93L            | 4     | NS8_P93L     |
| Spike   | D287N           | 4     | Spike_D287N  |
| NSP2    | K337E           | 4     | NSP2_K337E   |

|       |          |   |               |
|-------|----------|---|---------------|
| NSP3  | K1804N   | 4 | NSP3_K1804N   |
| NSP16 | Q3L      | 4 | NSP16_Q3L     |
| Spike | D178G    | 4 | Spike_D178G   |
| NSP2  | G392R    | 4 | NSP2_G392R    |
| Spike | G1124V   | 4 | Spike_G1124V  |
| NSP14 | S134F    | 4 | NSP14_S134F   |
| NSP9  | T24I     | 4 | NSP9_T24I     |
| Spike | N439K    | 4 | Spike_N439K   |
| NSP13 | A505P    | 4 | NSP13_A505P   |
| NSP13 | A598S    | 4 | NSP13_A598S   |
| NSP3  | I1683T   | 4 | NSP3_I1683T   |
| NSP3  | K429N    | 3 | NSP3_K429N    |
| NSP14 | K349N    | 3 | NSP14_K349N   |
| NSP12 | Q292H    | 3 | NSP12_Q292H   |
| Spike | L5F      | 3 | Spike_L5F     |
| NSP3  | A667T    | 3 | NSP3_A667T    |
| NSP3  | A690V    | 3 | NSP3_A690V    |
| NSP2  | H208Y    | 3 | NSP2_H208Y    |
| NSP3  | H290Y    | 3 | NSP3_H290Y    |
| N     | D144Y    | 3 | N_D144Y       |
| NS3   | S171L    | 3 | NS3_S171L     |
| NSP13 | S80G     | 3 | NSP13_S80G    |
| NSP2  | T388I    | 3 | NSP2_T388I    |
| NSP8  | T148I    | 3 | NSP8_T148I    |
| NS3   | V13L     | 3 | NS3_V13L      |
| NSP3  | Q1884H   | 3 | NSP3_Q1884H   |
| NS3   | L106R    | 3 | NS3_L106R     |
| NSP3  | A488V    | 3 | NSP3_A488V    |
| Spike | A222V    | 3 | Spike_A222V   |
| N     | A134V    | 3 | N_A134V       |
| NSP3  | A1311V   | 3 | NSP3_A1311V   |
| NSP3  | S1265del | 2 | NSP3_S1265del |
| NSP3  | T204I    | 2 | NSP3_T204I    |
| NSP3  | T1072I   | 2 | NSP3_T1072I   |
| NSP2  | E201A    | 2 | NSP2_E201A    |
| NS3   | E102Q    | 2 | NS3_E102Q     |
| NSP6  | V149F    | 2 | NSP6_V149F    |
| NS3   | V255del  | 2 | NS3_V255del   |
| NS3   | V202L    | 2 | NS3_V202L     |
| NSP3  | L1328F   | 2 | NSP3_L1328F   |
| NSP3  | L1266I   | 2 | NSP3_L1266I   |
| NSP15 | A94T     | 2 | NSP15_A94T    |
| NS3   | W193L    | 2 | NS3_W193L     |
| NSP4  | I383F    | 2 | NSP4_I383F    |
| NSP1  | G30S     | 2 | NSP1_G30S     |
| NSP2  | G147D    | 2 | NSP2_G147D    |
| NS3   | T175I    | 2 | NS3_T175I     |
| N     | T362I    | 2 | N_T362I       |
| NSP2  | T497K    | 2 | NSP2_T497K    |
| Spike | T76I     | 2 | Spike_T76I    |
| NSP3  | K529R    | 2 | NSP3_K529R    |

|       |         |   |              |
|-------|---------|---|--------------|
| NSP12 | E254D   | 2 | NSP12_E254D  |
| NS8   | V62L    | 2 | NS8_V62L     |
| NSP9  | V76A    | 2 | NSP9_V76A    |
| NSP7  | V58A    | 2 | NSP7_V58A    |
| NS3   | L41F    | 2 | NS3_L41F     |
| NS3   | W131C   | 2 | NS3_W131C    |
| NSP13 | D260Y   | 2 | NSP13_D260Y  |
| N     | D402Y   | 2 | N_D402Y      |
| NS8   | I58V    | 2 | NS8_I58V     |
| NSP3  | G17C    | 2 | NSP3_G17C    |
| NSP3  | M1556L  | 2 | NSP3_M1556L  |
| NSP3  | L1096I  | 2 | NSP3_L1096I  |
| NSP2  | L71F    | 2 | NSP2_L71F    |
| NS7a  | I3F     | 2 | NS7a_I3F     |
| NSP3  | S1675I  | 1 | NSP3_S1675I  |
| NSP14 | S503L   | 1 | NSP14_S503L  |
| NSP3  | S284C   | 1 | NSP3_S284C   |
| E     | S55F    | 1 | E_S55F       |
| M     | S4F     | 1 | M_S4F        |
| NSP10 | T12I    | 1 | NSP10_T12I   |
| NSP3  | T423I   | 1 | NSP3_T423I   |
| N     | K387R   | 1 | N_K387R      |
| NSP3  | K945N   | 1 | NSP3_K945N   |
| NS8   | E59stop | 1 | NS8_E59stop  |
| Spike | E484K   | 1 | Spike_E484K  |
| NSP1  | E36K    | 1 | NSP1_E36K    |
| NSP12 | Y546C   | 1 | NSP12_Y546C  |
| Spike | V213L   | 1 | Spike_V213L  |
| NS3   | V50I    | 1 | NS3_V50I     |
| NSP5  | V261F   | 1 | NSP5_V261F   |
| Spike | V1122L  | 1 | Spike_V1122L |
| Spike | V367F   | 1 | Spike_V367F  |
| NS3   | V55I    | 1 | NS3_V55I     |
| Spike | V1040F  | 1 | Spike_V1040F |
| NSP15 | V320L   | 1 | NSP15_V320L  |
| NSP16 | Q238H   | 1 | NSP16_Q238H  |
| Spike | M1237I  | 1 | Spike_M1237I |
| NS8   | C83S    | 1 | NS8_C83S     |
| E     | C40L    | 1 | E_C40L       |
| NS7a  | L102P   | 1 | NS7a_L102P   |
| NSP6  | L125F   | 1 | NSP6_L125F   |
| NS3   | L53F    | 1 | NS3_L53F     |
| NS8   | L95F    | 1 | NS8_L95F     |
| E     | L39C    | 1 | E_L39C       |
| NSP2  | A159S   | 1 | NSP2_A159S   |
| NS3   | A59T    | 1 | NS3_A59T     |
| NSP3  | A338H   | 1 | NSP3_A338H   |
| Spike | A879T   | 1 | Spike_A879T  |
| E     | A41L    | 1 | E_A41L       |
| NSP12 | W617F   | 1 | NSP12_W617F  |
| NSP3  | P822L   | 1 | NSP3_P822L   |

|       |            |   |                 |
|-------|------------|---|-----------------|
| NS3   | P262S      | 1 | NS3_P262S       |
| NSP14 | P140S      | 1 | NSP14_P140S     |
| NSP3  | P2L        | 1 | NSP3_P2L        |
| NSP3  | ins336DHNY | 1 | NSP3_ins336DHNY |
| NSP12 | ins617LR   | 1 | NSP12_ins617LR  |
| NSP14 | H455Y      | 1 | NSP14_H455Y     |
| NS3   | D210Y      | 1 | NS3_D210Y       |
| N     | D144N      | 1 | N_D144N         |
| NSP12 | D618N      | 1 | NSP12_D618N     |
| NSP12 | D284N      | 1 | NSP12_D284N     |
| NSP3  | D174Y      | 1 | NSP3_D174Y      |
| Spike | G261V      | 1 | Spike_G261V     |
| NSP3  | G777V      | 1 | NSP3_G777V      |
| NSP3  | G145C      | 1 | NSP3_G145C      |
| NSP1  | G137S      | 1 | NSP1_G137S      |
| Spike | G1167R     | 1 | Spike_G1167R    |
| NSP3  | G337S      | 1 | NSP3_G337S      |
| NSP14 | G481S      | 1 | NSP14_G481S     |
| NSP9  | G37R       | 1 | NSP9_G37R       |
| NSP15 | S261L      | 1 | NSP15_S261L     |
| N     | S201N      | 1 | N_S201N         |
| NSP2  | S378F      | 1 | NSP2_S378F      |
| NSP15 | S308Y      | 1 | NSP15_S308Y     |
| NS3   | S92L       | 1 | NS3_S92L        |
| NSP6  | F35L       | 1 | NSP6_F35L       |
| NSP6  | F34V       | 1 | NSP6_F34V       |
| NSP14 | F217del    | 1 | NSP14_F217del   |
| Spike | F1121L     | 1 | Spike_F1121L    |
| Spike | T1238S     | 1 | Spike_T1238S    |
| Spike | T859I      | 1 | Spike_T859I     |
| NSP2  | T170I      | 1 | NSP2_T170I      |
| NS8   | T26I       | 1 | NS8_T26I        |
| NSP3  | T1303I     | 1 | NSP3_T1303I     |
| NSP6  | T29P       | 1 | NSP6_T29P       |
| NSP14 | T215K      | 1 | NSP14_T215K     |
| NSP6  | T172A      | 1 | NSP6_T172A      |
| NSP3  | N922S      | 1 | NSP3_N922S      |
| NSP12 | N9Y        | 1 | NSP12_N9Y       |
| Spike | N751K      | 1 | Spike_N751K     |
| NS3   | K67R       | 1 | NS3_K67R        |
| NSP2  | K456R      | 1 | NSP2_K456R      |
| NS3   | E102K      | 1 | NS3_E102K       |
| Spike | E180G      | 1 | Spike_E180G     |
| Spike | E154K      | 1 | Spike_E154K     |
| Spike | E748D      | 1 | Spike_E748D     |
| NS3   | Y107C      | 1 | NS3_Y107C       |
| NSP14 | Y361C      | 1 | NSP14_Y361C     |
| NSP2  | V308L      | 1 | NSP2_V308L      |
| NSP10 | V7L        | 1 | NSP10_V7L       |
| NSP3  | V929I      | 1 | NSP3_V929I      |
| NSP13 | V266L      | 1 | NSP13_V266L     |

|       |                  |   |                       |
|-------|------------------|---|-----------------------|
| NSP3  | V267F            | 1 | NSP3_V267F            |
| Spike | V622F            | 1 | Spike_V622F           |
| NSP1  | V84del           | 1 | NSP1_V84del           |
| NS3   | Q185H            | 1 | NS3_Q185H             |
| NSP6  | Q30E             | 1 | NSP6_Q30E             |
| NSP12 | Q822H            | 1 | NSP12_Q822H           |
| NSP3  | Q995H            | 1 | NSP3_Q995H            |
| NSP1  | M85V             | 1 | NSP1_M85V             |
| NSP14 | C208del          | 1 | NSP14_C208del         |
| E     | C40del           | 1 | E_C40del              |
| NSP10 | C41S             | 1 | NSP10_C41S            |
| NSP14 | C210del          | 1 | NSP14_C210del         |
| Spike | L585F            | 1 | Spike_L585F           |
| NSP3  | L862F            | 1 | NSP3_L862F            |
| NSP14 | L209del          | 1 | NSP14_L209del         |
| Spike | L18F             | 1 | Spike_L18F            |
| NSP3  | L72F             | 1 | NSP3_L72F             |
| NSP12 | L8C              | 1 | NSP12_L8C             |
| E     | L39del           | 1 | E_L39del              |
| NSP6  | L33M             | 1 | NSP6_L33M             |
| NS7b  | L32F             | 1 | NS7b_L32F             |
| NSP3  | A1321V           | 1 | NSP3_A1321V           |
| NSP3  | A1105T           | 1 | NSP3_A1105T           |
| NSP3  | A1280V           | 1 | NSP3_A1280V           |
| NSP8  | A21V             | 1 | NSP8_A21V             |
| NS3   | A23S             | 1 | NS3_A23S              |
| E     | A41S             | 1 | E_A41S                |
| M     | A2S              | 1 | M_A2S                 |
| NSP6  | W31Y             | 1 | NSP6_W31Y             |
| NSP16 | P236L            | 1 | NSP16_P236L           |
| NSP3  | P1228S           | 1 | NSP3_P1228S           |
| NSP3  | P395L            | 1 | NSP3_P395L            |
| NSP13 | P326L            | 1 | NSP13_P326L           |
| NSP12 | ins9stop         | 1 | NSP12_ins9stop        |
| NSP6  | ins35VF          | 1 | NSP6_ins35VF          |
| NSP6  | ins171MTARTVYDDG | 1 | NSP6_ins171MTARTVYDDG |
| Spike | H1101Y           | 1 | Spike_H1101Y          |
| NSP3  | H1880Y           | 1 | NSP3_H1880Y           |
| NSP1  | H83del           | 1 | NSP1_H83del           |
| Spike | D936Y            | 1 | Spike_D936Y           |
| Spike | D253N            | 1 | Spike_D253N           |
| NSP14 | D496Y            | 1 | NSP14_D496Y           |
| Spike | D80Y             | 1 | Spike_D80Y            |
| NSP14 | D211del          | 1 | NSP14_D211del         |
| NSP16 | D26H             | 1 | NSP16_D26H            |
| NSP12 | D135Y            | 1 | NSP12_D135Y           |
| NS3   | D199Y            | 1 | NS3_D199Y             |
| NSP12 | R10C             | 1 | NSP12_R10C            |
| NSP14 | R212H            | 1 | NSP14_R212H           |
| N     | R209K            | 1 | N_R209K               |
| NSP14 | R213H            | 1 | NSP14_R213H           |

|       |          |   |               |
|-------|----------|---|---------------|
| NSP3  | I967T    | 1 | NSP3_I967T    |
| NSP13 | I333V    | 1 | NSP13_I333V   |
| NSP1  | G82del   | 1 | NSP1_G82del   |
| Spike | F186L    | 1 | Spike_F186L   |
| NSP13 | F373Y    | 1 | NSP13_F373Y   |
| Spike | F92H     | 1 | Spike_F92H    |
| NSP3  | S1206L   | 1 | NSP3_S1206L   |
| NSP14 | S255I    | 1 | NSP14_S255I   |
| NSP2  | S211H    | 1 | NSP2_S211H    |
| Spike | S94P     | 1 | Spike_S94P    |
| NSP3  | S1443F   | 1 | NSP3_S1443F   |
| Spike | T63A     | 1 | Spike_T63A    |
| NS6   | N39T     | 1 | NS6_N39T      |
| NSP3  | N1680D   | 1 | NSP3_N1680D   |
| NSP16 | N235R    | 1 | NSP16_N235R   |
| M     | K15M     | 1 | M_K15M        |
| M     | K14I     | 1 | M_K14I        |
| NS3   | Y264H    | 1 | NS3_Y264H     |
| NSP3  | Y519N    | 1 | NSP3_Y519N    |
| NSP2  | E210D    | 1 | NSP2_E210D    |
| NS8   | E106stop | 1 | NS8_E106stop  |
| NSP3  | V1936S   | 1 | NSP3_V1936S   |
| Spike | V1176F   | 1 | Spike_V1176F  |
| N     | V72I     | 1 | N_V72I        |
| NSP10 | V108del  | 1 | NSP10_V108del |
| NSP3  | V1935L   | 1 | NSP3_V1935L   |
| NSP2  | V447F    | 1 | NSP2_V447F    |
| N     | V270L    | 1 | N_V270L       |
| NSP13 | V371F    | 1 | NSP13_V371F   |
| NSP13 | V372A    | 1 | NSP13_V372A   |
| NSP5  | Q306R    | 1 | NSP5_Q306R    |
| Spike | Q14H     | 1 | Spike_Q14H    |
| NS8   | Q72H     | 1 | NS8_Q72H      |
| N     | M210V    | 1 | N_M210V       |
| NSP2  | M404V    | 1 | NSP2_M404V    |
| N     | M234V    | 1 | N_M234V       |
| NSP12 | M380L    | 1 | NSP12_M380L   |
| NSP4  | C296F    | 1 | NSP4_C296F    |
| Spike | L841I    | 1 | Spike_L841I   |
| NSP2  | L410F    | 1 | NSP2_L410F    |
| M     | L16Q     | 1 | M_L16Q        |
| Spike | L1063F   | 1 | Spike_L1063F  |
| NSP4  | L353F    | 1 | NSP4_L353F    |
| NSP2  | L213S    | 1 | NSP2_L213S    |
| NSP2  | L550I    | 1 | NSP2_L550I    |
| NS7a  | A79V     | 1 | NS7a_A79V     |
| NSP7  | A80V     | 1 | NSP7_A80V     |
| NS7b  | A15S     | 1 | NS7b_A15S     |
| NSP14 | A425V    | 1 | NSP14_A425V   |
| Spike | A783S    | 1 | Spike_A783S   |
| NSP4  | A380V    | 1 | NSP4_A380V    |

|       |              |   |                    |
|-------|--------------|---|--------------------|
| NSP4  | A231V        | 1 | NSP4_A231V         |
| Spike | A93Y         | 1 | Spike_A93Y         |
| NSP3  | P985L        | 1 | NSP3_P985L         |
| NSP3  | P1261S       | 1 | NSP3_P1261S        |
| NSP13 | P504S        | 1 | NSP13_P504S        |
| Spike | P1263L       | 1 | Spike_P1263L       |
| NSP10 | P107del      | 1 | NSP10_P107del      |
| N     | P199S        | 1 | N_P199S            |
| NS7a  | P99S         | 1 | NS7a_P99S          |
| NSP16 | ins234MstopM | 1 | NSP16_ins234MstopM |
| NSP13 | D369E        | 1 | NSP13_D369E        |
| N     | D128Y        | 1 | N_D128Y            |
| NSP3  | I617V        | 1 | NSP3_I617V         |
| NSP2  | R222C        | 1 | NSP2_R222C         |
| NS3   | G174V        | 1 | NS3_G174V          |
| NSP2  | G212T        | 1 | NSP2_G212T         |
| NS7a  | G38stop      | 1 | NS7a_G38stop       |
